# Supplementary material for: A Model for Improving Diet Quality within Child Nutrition Programs: The U.S. Army’s Child and Youth Services Healthy Menu Initiative
Source: MDPI journal article supplement (doi:10.3390/ijerph17082746), 2020-04-16
Supplement: s1 [file s1]

Installation/Facility

Week of/Dates:

| Week 1*          | Minimum Serving Size Per Age |             |           |                                   |                                                 |                               |                           |                                          |
|------------------|------------------------------|-------------|-----------|-----------------------------------|-------------------------------------------------|-------------------------------|---------------------------|------------------------------------------|
|                  | 1-2                          | 3-5         | 6-18      | Monday                            | Tuesday                                         | Wednesday                     | Thursday                  | Friday                                   |
| <b>Breakfast</b> |                              |             |           |                                   |                                                 |                               |                           |                                          |
| Fluid Milk**     | 1/2 c                        | 3/4 c       | 1 c       | Fluid Milk 1% or Whole            | Fluid Milk 1% or Whole                          | Fluid Milk 1% or Whole        | Fluid Milk 1% or Whole    | Fluid Milk 1% or Whole                   |
| Fruit/ Veg       | 1/4 c                        | 1/2 c       | 1/2 c     | Kiwi***                           | Hash brown potatoes                             | Honeydew melon***             | Banana                    | Orange (Mandarin oranges)                |
| Bread/ Grain     | 1/2 serving                  | 1/2 serving | 1 serving | WGR Rice Chex                     | WGR toast                                       | WGR toasted oat cereal        | WGR fruit & bran muffin   | WGR waffle                               |
| Meat/ Other      |                              |             |           | Yogurt                            | Scrambled eggs                                  |                               |                           | Pancake syrup (optional)                 |
| <b>Lunch</b>     |                              |             |           |                                   |                                                 |                               |                           |                                          |
|                  |                              |             |           | Meatloaf with WGR parsley noodles | Tuna salad with WGR crackers                    | Baked chicken                 | BBQ pork slider***        | Cheesy rice casserole                    |
| Meat/ Alt        | 1 oz                         | 1 1/2 oz    | 2 oz      | Ground beef                       | Tuna                                            | Chicken                       | Pork                      | Egg, cheese                              |
| Bread/ Grain     | 1/2 serving                  | 1/2 serving | 1 serving | WGR pasta                         | WGR crackers                                    | Quinoa pilaf***               | WGR roll                  | Brown rice                               |
| Fruit            | 1/8 c                        | 1/4 c       | 1/4 c     | Carrots                           | Banana                                          | Collard greens***             | Coleslaw*** (cauliflower) | Pineapple (crushed pineapple)            |
| Vegetable        | 1/8 c                        | 1/4 c       | 1/2 c     | Green beans                       | Broccoli (steamed for CDC)                      | Sweet potatoes                | Pinto beans               | Peas                                     |
| Fluid Milk**     | 1/2 c                        | 3/4 c       | 1 c       | Fluid Milk 1% or Whole            | Fluid Milk 1% or Whole                          | Fluid Milk 1% or Whole        | Fluid Milk 1% or Whole    | Fluid Milk 1% or Whole                   |
| Other            |                              |             |           |                                   | Creamy vegetable dip^^                          |                               |                           |                                          |
| <b>PM Snack</b>  |                              |             |           |                                   |                                                 |                               |                           |                                          |
| Fruit            | 1/2 c                        | 1/2 c       | 3/4 c     | Apple                             | Orange (Mandarin oranges)                       | Pear                          | Peaches                   |                                          |
| Vegetable        | 1/2 c                        | 1/2 c       | 3/4 c     |                                   |                                                 |                               |                           | Broccoli & cauliflower (steamed for CDC) |
| Meat/ Alt        | 1/2 oz                       | 1/2 oz      | 1 oz      | Cheddar cheese (sliced)           |                                                 |                               | Yogurt                    |                                          |
| Bread/ Grain     | 1/2 serving                  | 1/2 serving | 1 serving | WGR soft pretzel                  | Trail mix [no pretzels or dried fruit for CDC]^ | Graham crackers without honey |                           | WGR crackers                             |
| Fluid Milk**     | 1/2 c                        | 1/2 c       | 1 c       |                                   | Fluid Milk 1% or Whole                          | Fluid Milk 1% or Whole        |                           | Fluid Milk 1% or Whole                   |
| Other            |                              |             |           |                                   |                                                 | Sunbutter^^                   | Granola^^                 | Creamy vegetable dip                     |

\*All hard foods must be cut to 1/4 inch for children under 2 and to 1/2 inch for children 2-3 years of age. For children under 3 years of age replace menu item with the food in parenthesis. **For children under 18 months, see appendix for important information.** Foods will not be cut onto rounds in CYS Facilities. Water available at meals/snacks and in classroom. Condiments are served as appropriate. WGR is whole grain rich. Menu subject to change. \*\*Serve only unflavored whole milk to children age one. Serve only unflavored 1% or skim milk to children 2 years old and older.

\*\*\* See menu notes for additional information or substitution options. ^Cooking project. ^^SAC only. Additional serving size information is located in the weekly notes and appendix.

*This institution is an equal opportunity provider.*

Approved by: \_\_\_\_\_

Signature Date: \_\_\_\_\_

XXXXX, Nutritionist IMCOM G9

Menus approved for use through: \_\_\_\_\_

Installation/Facility \_\_\_\_\_

Week of/Dates: \_\_\_\_\_

Week 1 Notes

Monday

- \*\*\*Kiwi  
May substitute pears for kiwi
- Yogurt  
1-5 years: 1/4 cup  
6-18 years: 1/2 cup
- Meatloaf  
1-2 years: 1/2 piece  
3-5 years: 3/4 piece  
6-18 years: 1 piece
- Parsley noodles  
1-5 years: 1/4 cup  
6-18 years: 1/2 cup

Tuesday

- Scrambled eggs  
1-5 years: 2 Tbsp  
6-18 years: 1/4 cup
- Tuna salad  
1-2 years: 1/4 cup  
3-5 years: 3/8 cup  
6-18 years: 1/2 cup
- Creamy vegetable dip  
1-5 years: none  
6-18 years: 1 1/2 Tbsp
- Trail mix:  
1-5 years: 5/8 cup (no pretzels or dried fruit)  
6-18 years: 1 cup (made with pretzels) or 1 1/8 cup (made without pretzels)

Wednesday

- \*\*\*Honeydew melon  
May substitute apples for honeydew melon
- \*\*\*Quinoa pilaf  
May substitute bulgur for quinoa, see quinoa pilaf recipe
- \*\*\*Collard greens  
May substitute turnip greens, sautéed spinach, kale, or chard for collard greens

Thursday

- BBQ pork sliders  
1-2 years: 1/2 sandwich  
3-18 years: 1 sandwich
- BBQ pork sliders\*\*\*  
May substitute sloppy lentil Joes for BBQ pork sliders

Friday

- Cheesy rice casserole  
1-5 years: 1/4 cup  
6-18 years: 1/2 cup

Approved by: \_\_\_\_\_

Signature Date: \_\_\_\_\_

XXXXX, Nutritionist IMCOM G9

Menus approved for use through: \_\_\_\_\_

Installation/Facility

Week of/Dates:

| Week 2*          | Minimum Serving Size Per Age |             |           |                                                 |                                                    |                                  |                               |                               |
|------------------|------------------------------|-------------|-----------|-------------------------------------------------|----------------------------------------------------|----------------------------------|-------------------------------|-------------------------------|
|                  | 1-2                          | 3-5         | 6-18      | Monday                                          | Tuesday                                            | Wednesday                        | Thursday                      | Friday                        |
| <b>Breakfast</b> |                              |             |           |                                                 |                                                    |                                  |                               |                               |
| Fluid Milk**     | 1/2 c                        | 3/4 c       | 1 c       | Fluid Milk 1% or Whole                          | Fluid Milk 1% or Whole                             | Fluid Milk 1% or Whole           | Fluid Milk 1% or Whole        | Fluid Milk 1% or Whole        |
| Fruit/ Veg       | 1/4 c                        | 1/2 c       | 1/2 c     | Pears                                           | Blueberries***                                     | Peaches***                       | Pineapple (crushed pineapple) | Cantaloupe                    |
| Bread/ Grain     | 1/2 serving                  | 1/2 serving | 1 serving | WGR corn puffs cereal (KIX)                     | Oatmeal                                            | WGR French toast bake            | WGR bagel                     | Bran flakes (WGR Life***)     |
| Meat/ Other      |                              |             |           |                                                 |                                                    | Yogurt                           | Scrambled eggs                |                               |
| <b>Lunch</b>     |                              |             |           | Bean burrito bowl                               | Chicken Alfredo***                                 | Shepard's pie***                 | Lemon baked fish              | Turkey burger slider          |
| Meat/ Alt        | 1 oz                         | 1 1/2 oz    | 2 oz      | Pinto beans & cheese                            | Chicken                                            | Beef                             | Fish                          | Ground turkey                 |
| Bread/ Grain     | 1/2 serving                  | 1/2 serving | 1 serving | Cilantro brown rice                             | WGR pasta                                          | WGR biscuit                      | WGR breadstick                | WGR roll                      |
| Fruit            | 1/8 c                        | 1/4 c       | 1/4 c     | Peaches                                         | Pineapple (crushed pineapple)                      | Orange (Mandarin oranges)        | Broccoli                      | Green beans                   |
| Vegetable        | 1/8 c                        | 1/4 c       | 1/2 c     | Diced tomatoes, romaine lettuce                 | Spinach salad (sautéed spinach)                    | Potatoes, carrots, peas [in pie] | Black beans                   | Potato wedges                 |
| Fluid Milk**     | 1/2 c                        | 3/4 c       | 1 c       | Fluid Milk 1% or Whole                          | Fluid Milk 1% or Whole                             | Fluid Milk 1% or Whole           | Fluid Milk 1% or Whole        | Fluid Milk 1% or Whole        |
| Other            |                              |             |           |                                                 |                                                    |                                  |                               | Lettuce, tomato, mayonnaise   |
| <b>PM Snack</b>  |                              |             |           |                                                 |                                                    |                                  |                               |                               |
| Fruit            | 1/2 c                        | 1/2 c       | 3/4 c     |                                                 |                                                    | Apples                           | Banana                        | Pear                          |
| Vegetable        | 1/2 c                        | 1/2 c       | 3/4 c     | Parmesan roasted cauliflower***, marinara sauce | Cherry tomato & corn salad***^ + carrots (steamed) | Cinnamon sweet potato cubes      |                               |                               |
| Meat/ Alt        | 1/2 oz                       | 1/2 oz      | 1 oz      |                                                 |                                                    |                                  |                               | Monterey-Jack cheese (sliced) |
| Bread/ Grain     | 1/2 serving                  | 1/2 serving | 1 serving |                                                 | WGR pita bread                                     |                                  | Graham crackers without honey | WGR crackers                  |
| Fluid Milk**     | 1/2 c                        | 1/2 c       | 1 c       | Fluid Milk 1% or Whole                          |                                                    | Fluid Milk 1% or Whole           | Fluid Milk 1% or Whole        |                               |
| Other            |                              |             |           |                                                 | Hummus                                             |                                  | Sunbutter^^                   |                               |

\*All hard foods must be cut to 1/4 inch for children under 2 and to 1/2 inch for children 2-3 years of age. For children under 3 years of age replace menu item with the food in parenthesis. **For children under 18 months, see appendix for important information.** Foods will not be cut onto rounds in CYS Facilities. Water available at meals/snacks and in classroom. Condiments are served as appropriate. WGR is whole grain rich. Menu subject to change. \*\*Serve only unflavored whole milk to children age one. Serve only unflavored 1% or skim milk to children 2 years old and older.

\*\*\* See menu notes for additional information or substitution options. ^Cooking project. ^^SAC only. Additional serving size information is located in the weekly notes and appendix.

*This institution is an equal opportunity provider.*

Approved by: \_\_\_\_\_

Signature Date: \_\_\_\_\_

XXXXX, Nutritionist IMCOM G9

Menus approved for use through: \_\_\_\_\_

Installation/Facility \_\_\_\_\_

Week 2 notes

Week of/Dates: \_\_\_\_\_

Monday

- Bean burrito bowl  
1-2 years: 1/4 c rice, 1/3 cup bean mixture, 1/8 cup tomatoes, (no lettuce for this age group), 2 tsp shredded cheese  
3-5 years: 1/4 c rice, 1/2 cup bean mixture, 1/8 cup tomatoes, 1/4 cup shredded lettuce, 1Tbsp shredded cheese  
6-18 years: 1/2 c rice, 2/3 cup beans, 1/4 cup tomatoes, 1/2 cup shredded lettuce, 1 Tbsp plus 1 tsp shredded cheese.
- \*\*\* Parmesan roasted cauliflower  
For children under 18 months old serve steamed cauliflower with Parmesan cheese sprinkled on top old
- Parmesan roasted cauliflower:  
1-5 years: 3/8 cup  
6-18 years: 1/2 cup
- Marinara sauce:  
1-5 years: 1/8 cup  
6-18 years: 1/4 cup

Tuesday

- \*\*\* Blueberries  
For children under 18 months chopped or pureed
- \*\*\*Chicken Alfredo  
May serve meat and pasta separately (see optional recipe)
- Chicken Alfredo  
1-2 years: 1/2 cup  
3-5 years: 3/4 cup  
6-18 years: 1 cup
- \*\*\*Cherry tomato & corn salad  
For children under 18 months old omitted this dish and replace with equal amount of carrots.
- Cherry tomato and corn Salad  
1-2: none  
2-5 years: 1/4 cup  
5-18 years: 3/8 cup

- Carrots  
1-2: 1/2 cup  
2-5 years: 1/4 cup  
5-18 years: 3/8 cup

Wednesday

- \*\*\*Peaches  
May substitute mango for peaches
- \*\*\*Peas in Shepard's pie  
For children under 18 months old, puree, chop, or omit. If omitted replace with equal amount of carrots.
- Beef Shepard's pie  
1-2 years: 1/2 cup  
3-5 years: 3/4 cup  
6-18 years: 1 cup

Thursday

- Scrambled eggs  
1-5 years: 2 Tbsp  
6-18 years: 1/4 cup
- Lemon baked fish:  
1-2 years: 1/2 portion  
3-5 years: 2/3 portion  
6-18 years: 1 portion

Friday

- WGR Life\*\*\*  
May substitute WGR Rice Chex for WGR Life
- Turkey burger sliders  
1-2 years: 1/2 slider  
3-18 years: 1 slider

Approved by: \_\_\_\_\_

Signature Date: \_\_\_\_\_

XXXXX, Nutritionist IMCOM G9

Menus approved for use through: \_\_\_\_\_

Installation/Facility

Week of/Dates:

| Week 3*          | Minimum Serving Size Per Age |             |           |                                                 |                               |                                               |                                       |                           |
|------------------|------------------------------|-------------|-----------|-------------------------------------------------|-------------------------------|-----------------------------------------------|---------------------------------------|---------------------------|
|                  | 1-2                          | 3-5         | 6-18      | Monday                                          | Tuesday                       | Wednesday                                     | Thursday                              | Friday                    |
| <b>Breakfast</b> |                              |             |           |                                                 | Breakfast taco***             |                                               |                                       |                           |
| Fluid Milk**     | 1/2 c                        | 3/4 c       | 1 c       | Fluid Milk 1% or Whole                          | Fluid Milk 1% or Whole        | Fluid Milk 1% or Whole                        | Fluid Milk 1% or Whole                | Fluid Milk 1% or Whole    |
| Fruit/ Veg       | 1/4 c                        | 1/2 c       | 1/2 c     | Peaches***                                      | Pineapple (crushed pineapple) | Banana                                        | Strawberries                          | Orange (Mandarin oranges) |
| Bread/ Grain     | 1/2 serving                  | 1/2 serving | 1 serving | WGR English muffin                              | WGR tortilla                  | WGR toasted oat cereal                        | Oven-baked whole wheat pancake        | WGR Rice Chex             |
| Meat/ Other      |                              |             |           |                                                 | Scrambled eggs                | Yogurt                                        | Pancake syrup (optional)              |                           |
| <b>Lunch</b>     |                              |             |           | Cheesy noodles with beef***                     | Roasted pork ***              | Teriyaki turkey                               | Southwestern white bean soup          | Crispy baked chicken***   |
| Meat/ Alt        | 1 oz                         | 1 1/2 oz    | 2 oz      | Ground beef & cheese                            | Pork***                       | Turkey                                        | White beans + cheddar cheese (sliced) | Chicken                   |
| Bread/ Grain     | 1/2 serving                  | 1/2 serving | 1 serving | WGR pasta                                       | WGR roll                      | Brown rice                                    | WGR breadstick                        | WGR biscuit               |
| Fruit            | 1/8 c                        | 1/4 c       | 1/4 c     | Cauliflower                                     | Broccoli                      | Pears                                         | Apple                                 | Collard greens            |
| Vegetable        | 1/8 c                        | 1/4 c       | 1/2 c     | Carrots                                         | Black beans                   | Peas                                          | Green beans                           | Sweet potatoes            |
| Fluid Milk**     | 1/2 c                        | 3/4 c       | 1 c       | Fluid Milk 1% or Whole                          | Fluid Milk 1% or Whole        | Fluid Milk 1% or Whole                        | Fluid Milk 1% or Whole                | Fluid Milk 1% or Whole    |
| Other            |                              |             |           |                                                 |                               |                                               |                                       |                           |
| <b>PM Snack</b>  |                              |             |           |                                                 |                               | Lemon pasta salad****^                        |                                       |                           |
| Fruit            | 1/2 c                        | 1/2 c       | 3/4 c     | Pear                                            | Apple                         |                                               |                                       | Peaches                   |
| Vegetable        | 1/2 c                        | 1/2 c       | 3/4 c     |                                                 |                               | Tomato, cucumber + broccoli [steamed for CDC] | Potato wedges & marinara sauce        |                           |
| Meat/ Alt        | 1/2 oz                       | 1/2 oz      | 1 oz      |                                                 |                               |                                               |                                       | Yogurt                    |
| Bread/ Grain     | 1/2 serving                  | 1/2 serving | 1 serving | Trail mix [no pretzels or dried fruit for CDC]^ | Graham Crackers without honey | WGR pasta                                     |                                       |                           |
| Fluid Milk**     | 1/2 c                        | 1/2 c       | 1 c       | Fluid Milk 1% or Whole                          | Fluid Milk 1% or Whole        |                                               | Fluid Milk 1% or Whole                |                           |
| Other            |                              |             |           |                                                 | Sunbutter^^                   | Creamy vegetable dip                          |                                       | Granola^^                 |

\*All hard foods must be cut to 1/4 inch for children under 2 and to 1/2 inch for children 2-3 years of age. For children under 3 years of age replace menu item with the food in parenthesis. For children under 18 months, see appendix for important information. Foods will not be cut onto rounds in CYS Facilities. Water available at meals/snacks and in classroom. Condiments are served as appropriate. WGR is whole grain rich. Menu subject to change. \*\*Serve only unflavored whole milk to children age one. Serve only unflavored 1% or skim milk to children 2 years old and older. \*\*\* See menu notes for additional information or substitution options. ^Cooking project. ^^SAC only. Additional serving size information is located in the weekly notes and appendix.

*This institution is an equal opportunity provider.*

Approved by: \_\_\_\_\_

Signature Date: \_\_\_\_\_

XXXXX, Nutritionist IMCOM G9

Menus approved for use through: \_\_\_\_\_

Installation/Facility\_\_\_\_\_

Week of/Dates:\_\_\_\_\_

Week 3 Notes

Monday

- \*\*\*Peaches  
May substitute mango for peaches
- \*\*\* Cheesy noodles with beef  
May serve meat and pasta separately (see optional recipe)
- Cheesy noodles with beef  
1-2 years: ½ c + 1 tsp  
3-5 years: ¾ c + 1/2 Tbsp  
6-18 years: 1 c + 1 Tbsp
- Trail mix:  
1-5 years: 5/8 cup (no pretzels or dried fruit)  
6-18 years: 1 cup (made with pretzels) or 1 1/8 cup (made without pretzels)

Tuesday

- \*\*\*Corn in breakfast tacos  
Omit for CDC
- Breakfast Taco:  
1-5 years: 1 taco  
6-18 years: 1 taco
- \*\*\* Roasted pork  
May substitute chicken for roasted pork

Wednesday

- Yogurt  
1-5 years: 1/4 cup  
6-18 years: 1/2 cup
- Turkey Teriyaki:  
1-2 years: 1/2 serving  
3-5 years 3/4 serving  
6-18 years: 1 serving

- \*\*\*Cucumbers in lemon pasta salad:  
For children under 18 months old, remove skin on cucumbers

- Lemon Pasta Salad:  
1-5 years: 1/2 cup  
6-18 years: 1 cup
- Broccoli  
1-18 years: 1/4 cup

Thursday

- \*\*\*White beans and corn in southwestern white bean  
For children under 18 months old, chop corn and beans or puree soup.
- Southwestern white bean soup  
1-2 years: 1/2 cup  
3-5 years: 1/2 cup  
6-18 years: 1 cup
- Cheddar cheese  
1-2 years: 1/2 oz  
3-5 years: 1 oz  
6-18 years: 1 oz
- Potato Wedges:  
1-5 years: 3/8 cup  
6-18 years: 1/2 cup
- Marinara:  
1-5 years: 1/8 cup  
6-18 years: 1/4 cup

Friday

- \*\*\*Crispy baked chicken  
For children under 18 months, serve chicken without breading.

Approved by: \_\_\_\_\_

Signature Date: \_\_\_\_\_

XXXXX, Nutritionist IMCOM G9

Menus approved for use through: \_\_\_\_\_

Installation/Facility

Week of/Dates:

| Week 4*          | Minimum Serving Size Per Age |             |           |                           |                          |                               |                                                              |                                            |
|------------------|------------------------------|-------------|-----------|---------------------------|--------------------------|-------------------------------|--------------------------------------------------------------|--------------------------------------------|
|                  | 1-2                          | 3-5         | 6-18      | Monday                    | Tuesday                  | Wednesday                     | Thursday                                                     | Friday                                     |
| <b>Breakfast</b> |                              |             |           |                           |                          |                               |                                                              |                                            |
| Fluid Milk**     | 1/2 c                        | 3/4 c       | 1 c       | Fluid Milk 1% or Whole    | Fluid Milk 1% or Whole   | Fluid Milk 1% or Whole        | Fluid Milk 1% or Whole                                       | Fluid Milk 1% or Whole                     |
| Fruit/ Veg       | 1/4 c                        | 1/2 c       | 1/2 c     | Banana                    | Applesauce               | Pineapple (crushed pineapple) | Blueberries                                                  | Orange (Mandarin orange)                   |
| Bread/ Grain     | 1/2 serving                  | 1/2 serving | 1 serving | Bran flakes (WGR Life***) | WGR biscuit              | Oatmeal                       | WGR waffle                                                   | WGR bagel                                  |
| Meat/ Other      |                              |             |           |                           | Scrambled eggs           |                               | Pancake syrup (optional)                                     | Yogurt                                     |
| <b>Lunch</b>     |                              |             |           | Roasted turkey            | Lemon salmon cake***     | Frittata                      | Chicken curry                                                | Spaghetti & meat sauce                     |
| Meat/ Alt        | 1 oz                         | 1 1/2 oz    | 2 oz      | Turkey                    | Salmon                   | Egg                           | Chicken                                                      | Ground beef                                |
| Bread/ Grain     | 1/2 serving                  | 1/2 serving | 1 serving | WGR bread dressing        | WGR roll                 | WGR breadstick***             | Brown rice                                                   | WGR pasta                                  |
| Fruit            | 1/8 c                        | 1/4 c       | 1/4 c     | Broccoli                  | Coleslaw (carrots)       | Cantaloupe***                 | Pear                                                         | Peaches                                    |
| Vegetable        | 1/8 c                        | 1/4 c       | 1/2 c     | Pinto beans               | Potato wedges            | Peas                          | Green beans                                                  | Tossed salad (broccoli)                    |
| Fluid Milk**     | 1/2 c                        | 3/4 c       | 1 c       | Fluid Milk 1% or Whole    | Fluid Milk 1% or Whole   | Fluid Milk 1% or Whole        | Fluid Milk 1% or Whole                                       | Fluid Milk 1% or Whole                     |
| Other            |                              |             |           |                           |                          |                               |                                                              | Italian salad dressing                     |
| <b>PM Snack</b>  |                              |             |           |                           |                          |                               | English muffin pizza^                                        |                                            |
| Fruit            | 1/2 c                        | 1/2 c       | 3/4 c     | Honeydew melon***         | Orange (Mandarin orange) | Apple                         |                                                              |                                            |
| Vegetable        | 1/2 c                        | 1/2 c       | 3/4 c     |                           |                          | Cinnamon sweet potato cubes   | Tomato sauce, vegetable toppings + carrots (steamed for CDC) | Cucumber and cauliflower (steamed for CDC) |
| Meat/ Alt        | 1/2 oz                       | 1/2 oz      | 1 oz      |                           |                          |                               | Cheese on pizza                                              |                                            |
| Bread/ Grain     | 1/2 serving                  | 1/2 serving | 1 serving | Carrot muffin***          | Trail mix                |                               | WGR English muffin                                           | WGR crackers                               |
| Fluid Milk**     | 1/2 c                        | 1/2 c       | 1 c       | Fluid Milk 1% or Whole    | Fluid Milk 1% or Whole   | Fluid Milk 1% or Whole        |                                                              |                                            |
| Other            |                              |             |           |                           |                          |                               | Creamy vegetable dip                                         | Sesame dipping sauce                       |

\*All hard foods must be cut to 1/4 inch for children under 2 and to 1/2 inch for children 2-3 years of age. For children under 3 years of age replace menu item with the food in parenthesis. For children under 18 months, see appendix for important information. Foods will not be cut onto rounds in CYS Facilities. Water available at meals/snacks and in classroom. Condiments are served as appropriate. WGR is whole grain rich. Menu subject to change. \*\*Serve only unflavored whole milk to children age one. Serve only unflavored 1% or skim milk to children 2 years old and older.

\*\*\* See menu notes for additional information or substitution options. ^Cooking project. ^^SAC only. Additional serving size information is located in the weekly notes and appendix.

*This institution is an equal opportunity provider.*

Approved by: \_\_\_\_\_

Signature Date: \_\_\_\_\_

XXXXX, Nutritionist IMCOM G9

Menus approved for use through: \_\_\_\_\_

Installation/Facility\_\_\_\_\_

Week of/Dates:\_\_\_\_\_

Week 4 Notes

Monday

- WGR Life\*\*\*  
May substitute WGR toasted oat cereal for WGR Life cereal
- WGR bread dressing  
1-5 years: 1/2 piece  
6-18 years: 1 piece
- \*\*\*Honeydew melon  
May substitute crushed pineapple for honeydew melon
- \*\*\*WGR carrot muffins: two recipe options for WGR carrot muffin. One is with quinoa and the other is with oatmeal.
- Carrot muffin  
1-5 years: 1/2 muffin  
6-18 years: 1 muffin

Tuesday

- Scrambled eggs  
1-5 years: 2 Tbsp  
6-18 years: 1/4 cup
- \*\*\*Lemon baked salmon cake  
May substitute tuna for salmon in recipe
- Lemon baked salmon cakes:  
1-2 years: 2/3 cake  
3-5 years: 1 cake  
6-18 years: 1 1/3 cake (or one large) see recipe
- Trail mix:  
1-5 years: 5/8 cup (no pretzels or dried fruit)  
6-18 years: 1 cup (made with pretzels) or 1 1/8 cup (made without pretzels)

Wednesday

- Frittata  
1-2 years: 1/2 piece  
3-5 years: 3/4 piece  
6-18 years: 1 piece
- \*\*\*Breadstick  
May substitute WGR toast for breadstick
- \*\*\*Cantaloupe  
May substitute banana for cantaloupe

Thursday

- Chicken curry  
1-2 years: 1/2 serving (about 3 Tbsp)  
3-5 years: 3/4 serving (about 1/4 cup)  
6-18 years: 1 serving (about 1/3 cup)
- English muffin pizza  
1-5 years: 1 pizza  
6-18 years: 2 pizzas
- Carrots  
1-5 years: 1/2 cup  
6-18 years: 5/8 cup

Friday

- Meat spaghetti sauce  
1-2 years: 1/4 cup  
3-5 years: 3/8 cup  
6-18 years: 1/2 cup
- Sesame dipping sauce  
1-5: 1 Tbsp  
6-18 years: 1 1/2 Tbsp

Approved by: \_\_\_\_\_

Signature Date: \_\_\_\_\_

XXXXX, Nutritionist IMCOM G9

Menus approved for use through: \_\_\_\_\_



Installation/Facility

Week of/Dates:

| Week 5*          | Minimum Serving Size Per Age |             |           |                                          |                        |                                          |                               |                                    |
|------------------|------------------------------|-------------|-----------|------------------------------------------|------------------------|------------------------------------------|-------------------------------|------------------------------------|
|                  | 1-2                          | 3-5         | 6-18      | Monday                                   | Tuesday                | Wednesday                                | Thursday                      | Friday                             |
| <b>Breakfast</b> |                              |             |           |                                          | Breakfast tacos***     |                                          |                               |                                    |
| Fluid Milk**     | 1/2 c                        | 3/4 c       | 1 c       | Fluid Milk 1% or Whole                   | Fluid Milk 1% or Whole | Fluid Milk 1% or Whole                   | Fluid Milk 1% or Whole        | Fluid Milk 1% or Whole             |
| Fruit/ Veg       | 1/4 c                        | 1/2 c       | 1/2 c     | Orange (Mandarin oranges)                | Applesauce             | Kiwi***                                  | Cantaloupe                    | Peaches                            |
| Bread/ Grain     | 1/2 serving                  | 1/2 serving | 1 serving | Toasted oat cereal                       | WGR tortilla           | WGR bagel                                | WGR French toast bake         | WGR corn puffs cereal KIX          |
| Meat/ Other      |                              |             |           |                                          | Scrambled eggs         | Cream cheese                             | Yogurt                        |                                    |
| <b>Lunch</b>     |                              |             |           | Bean enchilada bake                      | Roasted pork***        | Strawberry*** spinach salad with chicken | Sesame beef                   | Turkey sandwich                    |
| Meat/ Alt        | 1 oz                         | 1 1/2 oz    | 2 oz      | Beans & cheese                           | Pork                   | Chicken                                  | Beef                          | Turkey                             |
| Bread/ Grain     | 1/2 serving                  | 1/2 serving | 1 serving | WGR tortilla***                          | WGR pasta              | WGR crackers                             | Brown rice                    | WGR bread                          |
| Fruit            | 1/8 c                        | 1/4 c       | 1/4 c     | Peaches                                  | Carrots                | Apple                                    | Pineapple (crushed pineapple) | Cucumber, celery^^                 |
| Vegetable        | 1/8 c                        | 1/4 c       | 1/2 c     | Tossed salad (green beans)               | Black beans            | Spinach (sautéed)                        | Sautéed cabbage (peas)        | Potato, corn & cauliflower soup*** |
| Fluid Milk**     | 1/2 c                        | 3/4 c       | 1 c       | Fluid Milk 1% or Whole                   | Fluid Milk 1% or Whole | Fluid Milk 1% or Whole                   | Fluid Milk 1% or Whole        | Fluid Milk 1% or Whole             |
| Other            |                              |             |           | Salad dressing                           |                        |                                          |                               | Creamy vegetable dip               |
| <b>PM Snack</b>  |                              |             |           |                                          |                        |                                          |                               | Cinnamon nachos^                   |
| Fruit            | 1/2 c                        | 1/2 c       | 3/4 c     |                                          | Pear                   |                                          |                               | Mango*** and bananas               |
| Vegetable        | 1/2 c                        | 1/2 c       | 3/4 c     | Broccoli & cauliflower (steamed for CDC) |                        | Potato wedges & marinara sauce           | Carrots [steamed for CDC]     |                                    |
| Meat/ Alt        | 1/2 oz                       | 1/2 oz      | 1 oz      |                                          | Cheese                 |                                          |                               |                                    |
| Bread/ Grain     | 1/2 serving                  | 1/2 serving | 1 serving | WGR soft pretzel                         | WGR crackers           |                                          | WGR pita bread                | WGR tortilla                       |
| Fluid Milk**     | 1/2 c                        | 1/2 c       | 1 c       | Fluid Milk 1% or Whole                   |                        | Fluid Milk 1% or Whole                   |                               |                                    |
| Other            |                              |             |           | Creamy vegetable dip                     |                        |                                          | Hummus                        |                                    |

\*All hard foods must be cut to 1/4 inch for children under 2 and to 1/2 inch for children 2-3 years of age. For children under 3 years of age replace menu item with the food in parenthesis. For children under 18 months, see appendix for important information. Foods will not be cut onto rounds in CYS Facilities. Water available at meals/snacks and in classroom. Condiments are served as appropriate. WGR is whole grain rich. Menu subject to change. \*\*Serve only unflavored whole milk to children age one. Serve only unflavored 1% or skim milk to children 2 years old and older. \*\*\* See menu notes for additional information or substitution options. ^Cooking project. ^^SAC only. Additional serving size information is located in the weekly notes and appendix.

*This institution is an equal opportunity provider.*

Week 5 Notes

Approved by: \_\_\_\_\_

Signature Date: \_\_\_\_\_

XXXXX, Nutritionist IMCOM G9

Menus approved for use through: \_\_\_\_\_

Installation/Facility: \_\_\_\_\_

Week of/Dates: \_\_\_\_\_

Monday

- Bean enchilada bake  
1-2 years: 1/2 cup  
3-5 years: 3/4 cup  
6-18 years: 1 cup
- \*\*\*WGR tortilla  
May use WGR flour or WGR corn tortilla

Tuesday

- \*\*\*Corn in breakfast tacos  
Omit for CDC
- Breakfast Taco:  
1-5 years: 1 taco  
6-18 years: 1 taco
- Roasted pork\*\*\*  
May substitute pinto beans for roasted pork. If this substitution is made then add broccoli as the vegetable.

Wednesday

- \*\*\*Kiwi  
May substitute crushed pineapple for kiwi
- Strawberry spinach salad
- 1-2 years: none  
3-5 years: 1/2 cup  
6-18 years: 1 cup
- \*\*\*Strawberries  
May substitute mandarin oranges for strawberries
- Potato wedges:  
1-5 years: 3/8 cup  
6-18 years: 1/2 cup
- Marinara:  
1-5 years: 1/8 cup  
6-18 years: 1/4 cup

Thursday

- Yogurt  
1-5 years: 1/4 cup  
6-18 years: 1/2 cup
- Sesame beef  
1-2 years: 1/2 serving (1 oz cooked)  
3-5 years: 3/4 serving (1 1/2 oz cooked)  
6-18 years: 1 serving (2 oz cooked)

Friday

- \*\*\* Potato, corn, and cauliflower soup  
For children under 18 months old, puree corn or substitute cauliflower for soup.
- Potato, corn, and cauliflower soup:  
1-2 years: 1/4 cup  
3-5 years: 1/2 cup  
6-18 years: 1 cup
- Turkey Sandwich  
1-2 years: 2 quarter pieces of sandwich  
3-5 years: 3 quarter pieces of sandwich  
6-18 years: 1 full sandwich
- Creamy vegetable dip  
1-5 years: 1 Tbsp  
6-18 years: 1 1/2 Tbsp
- Mango\*\*\*  
May substitute strawberries for mango.
- WGR cinnamon nachos (with 6-inch tortilla)  
1-5 years: 1/2 tortilla plus 1/2 c fruit  
6-18 years: 1 tortilla plus 3/4 c fruit
- WGR cinnamon nachos (with 8-inch tortilla)  
1-5 years: 1/3 tortilla plus 1/2 c fruit  
6-18 years: 2/3 tortilla plus 3/4 c fruit

Approved by: \_\_\_\_\_

Signature Date: \_\_\_\_\_

XXXXX, Nutritionist IMCOM G9

Menus approved for use through: \_\_\_\_\_

Installation/Facility \_\_\_\_\_ Week of/Dates: \_\_\_\_\_

**Appendix:**

Unless noted otherwise in the menu template or weekly notes, serving sizes are as listed below.

½ serving of bread/grains = ½ slice of bread; ¼ cup of cooked breakfast cereal, cooked rice, cooked pasta or cooked grains; 4 saltine crackers; 1 whole graham cracker sheet (2 ½ x 5 inches); ½ muffin, ½ serving of muffin squares, cornbread, or French toast bake; ½ of a 1-oz biscuit, roll, or soft pretzel; ½ of a mini-bagel; ¼ of a 2-oz bagel; ½ of a 1.25-oz waffle; ¼ of a 2-oz English muffin or pita.

1 serving of bread/grains = 1 slice of bread; ½ cup of cooked breakfast cereal, cooked rice, cooked pasta or cooked grains; 8 saltine crackers, 2 whole graham cracker sheets (2 ½ x 5 inches); 1 muffin, 1 serving of muffin squares, cornbread, or French toast bake; 1 1-oz biscuit, roll, or soft pretzel; 1 mini bagel, ½ of a 2-oz bagel; 1 1.25-oz waffle; and ½ of a 2-oz English muffin or pita.

The serving size for ready to eat breakfast cereal varies by type:

|                           |                       |                        |                   |
|---------------------------|-----------------------|------------------------|-------------------|
| WGR Rice Chex or WGR Life | WGR corn puffs cereal | WGR toasted oat cereal | Bran flakes       |
| 1-2 years: ½ cup          | 1-2 years: ¾ cup      | 1-2 years: ½ cup       | 1-2 years: ½ cup  |
| 3-5 years: ½ cup          | 3-5 years: ¾ cup      | 3-5 years: ½ cup       | 3-5 years: ½ cup  |
| 6-18 years: 1 cup         | 6-18 years: 1 ¼ cup   | 6-18 years: 1 cup      | 6-18 years: 1 cup |

Ounce equivalents for meats/ alternates: cooked meat and cheese, 1 oz = 1 oz; cooked beans/ peas, ¼ c = 1 oz; yogurt, 4 oz (½ c) = 1 oz,

For “other” foods that do not count as a meal component, **unless specified otherwise in the weekly notes**, the serving size is below:

|                    |                      |                    |                    |
|--------------------|----------------------|--------------------|--------------------|
| Hummus             | Creamy vegetable dip | Sunbutter          | Granola            |
| 1-5 years: 2 Tbsp  | 1-5 years: 1 ½ Tbsp  | 1-5 years: none    | 1-5 years: 0       |
| 6-18 years: 3 Tbsp | 6-18 years: 2 Tbsp   | 6-18 years: 1 Tbsp | 6-18 years: 2 Tbsp |

Cream Cheese: Spread thin to prevent choking hazard, about ½ tsp per ½ serving of bagel (i.e., ½ tsp on ½ of a mini-bagel or ¼ of a 2-oz bagel).

Pancake Syrup: 2 tsp per ½ waffle or ½ serving of pancake bake. No syrup on French toast bake.

Salad Dressing: 1 ½ tsp per ½ cup of salad or 1 Tbsp per cup of salad.

Smart Balance: ½ tsp per ½ serving of toast, bagel, English muffin, brown bread, roll, and cornbread. ½ tsp per ¼ cup mashed potatoes. No spread on biscuits calculated, but may be used.

Approved by: \_\_\_\_\_

Signature Date: \_\_\_\_\_

XXXXX, Nutritionist IMCOM G9

Menus approved for use through: \_\_\_\_\_

Installation/Facility\_\_\_\_\_ Week of/Dates:\_\_\_\_\_

**For children under 18 months, the following foods should be modified as noted or a substitution should be offered.**

Apples: Offer applesauce.

Blueberries: Should be chopped or pureed.

Cheese: Should be served shredded or sliced in thin pieces.

Crispy baked chicken: Serve chicken without breading.

Coleslaw: Should not be given to this age group. Offer a substitution.

Corn: Puree, chop, or offer a substitution.

Cucumber: Should be served without skin, may require steaming if not soft enough to be cut with fork.

Crushed pineapple: Should not be given to this age group. Offer a substitution.

Fish: Serve tuna or checked carefully for bones.

Grapes: Even when cut into quarters, grapes should not be given to this age group. Offer a substitution.

Parmesan roasted cauliflower: Serve steamed cauliflower with Parmesan cheese sprinkled on top.

Peas: Should be chopped or pureed.

Southwestern white bean soup: Chop corn and beans or puree soup.

Approved by: \_\_\_\_\_

Signature Date: \_\_\_\_\_

XXXXX, Nutritionist IMCOM G9

Menus approved for use through: \_\_\_\_\_
