# Supplementary material for: A Model for Improving Diet Quality within Child Nutrition Programs: The U.S. Army’s Child and Youth Services Healthy Menu Initiative
Source: MDPI journal article supplement (doi:10.3390/ijerph17082746), 2020-04-16
Supplement: s1 [file s1]

|                                                                                             |                                                                                                                                                            |                                                                    |                                                                                       |                                                                                                                                                   |                                                                                                                    |                                                                                                |                                                                                    |                                                                                                                              |
|---------------------------------------------------------------------------------------------|------------------------------------------------------------------------------------------------------------------------------------------------------------|--------------------------------------------------------------------|---------------------------------------------------------------------------------------|---------------------------------------------------------------------------------------------------------------------------------------------------|--------------------------------------------------------------------------------------------------------------------|------------------------------------------------------------------------------------------------|------------------------------------------------------------------------------------|------------------------------------------------------------------------------------------------------------------------------|
|                                                                                             | Beef Paprikash                                                                                                                                             | Red Cabbage                                                        | Chicken Alfredo with a twist                                                          | Sweet potato plum bread square                                                                                                                    | Taco pie with beans                                                                                                | Porcupine sliders                                                                              | Whole grain cinnamon nachos                                                        | Strawberries & blueberries                                                                                                   |
| Effort Required to Prepare Meal (Use Preparation Scale.)                                    | 4                                                                                                                                                          | 2                                                                  | 3                                                                                     | 3                                                                                                                                                 | 3                                                                                                                  | 4                                                                                              | 3                                                                                  | 3                                                                                                                            |
| Time it Took to Prepare Meal (Use Preparation Scale.)                                       | 3                                                                                                                                                          | 2                                                                  | 3                                                                                     | 3                                                                                                                                                 | 3                                                                                                                  | 4                                                                                              | 3                                                                                  | 3                                                                                                                            |
| Quality of ingredients provided by vendor? (Use Quality Scale.) Explain.                    | 3                                                                                                                                                          | 3                                                                  | 3                                                                                     | 3                                                                                                                                                 | 3                                                                                                                  | 3                                                                                              | 3                                                                                  | 3                                                                                                                            |
| Quality (taste, textures, visual appeal) of finished product? (Use Quality Scale.) Explain. | 3                                                                                                                                                          | 3                                                                  | 5                                                                                     | 3                                                                                                                                                 | 3                                                                                                                  | 3                                                                                              | 4                                                                                  | 4                                                                                                                            |
| Did This Meal Require any Special Equipment or Kitchen Skills? Yes or No If yes, what?      | NO                                                                                                                                                         | YES, cutting up large amounts of cabbage                           | NO                                                                                    | YES, large mixer                                                                                                                                  | NO                                                                                                                 | NO                                                                                             | NO                                                                                 | NO                                                                                                                           |
| General Comments/Suggestions for the day                                                    | The kids did not eat it based on looks.<br><br>Sour cream could be reduced. It was a little overpowering.                                                  | The kids didn't even try it.<br><br>None of the children liked it. | The kids loved it.<br><br>All children like this.<br><br>This is an obvious favorite. | The kids and staff for the most part loved it.<br><br>Taste was good. Nice change for the children.<br><br>Very good cake not too sweet and soft. | Staff liked it but the kids didn't.<br><br>Easy make.<br><br>It was a hit with the children!                       | The kids love these, its just the time to prepare them.<br><br>It was a hit with the children! | Very popular with the kids.<br><br>The whole grain tortillas are chewy when baked. | Very popular with the kids.<br><br>These fruits are out of season and the kids eat the blueberries but not the strawberries. |
| Should We Make This Meal Again? (Yes, maybe, or no.)                                        | Maybe                                                                                                                                                      | No                                                                 | Yes                                                                                   | MAYBE                                                                                                                                             | YES, I think they will learn to like it                                                                            | YES                                                                                            | YES                                                                                | YES                                                                                                                          |
|                                                                                             | <u>Preparation Difficulty Scale</u><br>1      2      3      4      5<br>Less difficult or less time      Similar to usual      More difficult or more time |                                                                    |                                                                                       |                                                                                                                                                   | <u>Quality Scale</u><br>1      2      3      4      5<br>Poor Quality      Similar to usual      Excellent Quality |                                                                                                |                                                                                    |                                                                                                                              |
